# Supplementary material
Source: PubMed Central journal article supplement (PMC6998042)
Supplement: Supp_FigS1-S2_TableS1.pdf [file Supp_FigS1-S2_TableS1.pdf]

## SUPPLEMENTARY DATA

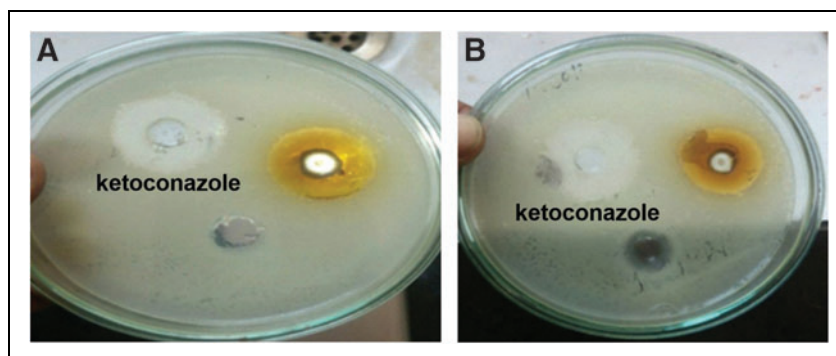

**Supplementary Fig. S1.** Activity of 0.3 mL fenugreek leaf (A) aqueous extract and (B) alcoholic extract against clinical isolate *Malassezia furfur* in comparison with 0.1 of ketoconazole solution (2% w/v) in DMSO. DMSO, dimethyl sulfoxide.

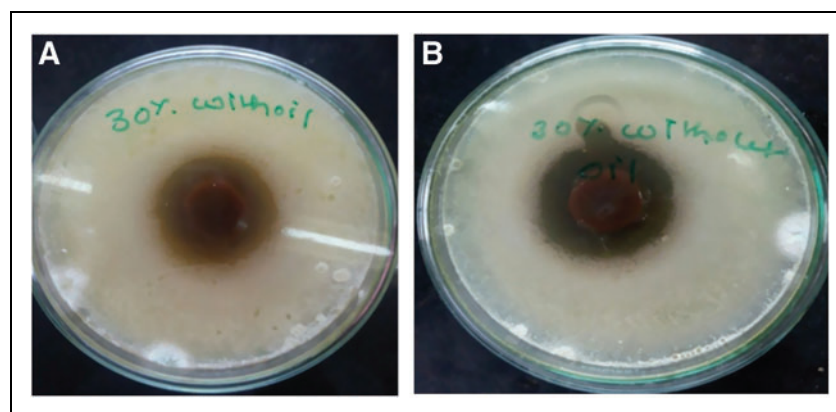

**Supplementary Fig. S2.** Activity of gel formulation containing 30% fenugreek leaf extract against *M. furfur* (MTCC 1374) (A) with and (B) without oil overlay. The activity of the gel did not differ with and without oil overlay, indicating that the formulation could be equally effective on the oily and dry scalp.

**Supplementary Table S1. Flavonoid Content of the Extracts on Various Days of Cold Maceration Process**

| Fenugreek leaf extract | Total flavonoid content ( $\mu\text{g}/\text{mg}$ ) |                     |                     |
|------------------------|-----------------------------------------------------|---------------------|---------------------|
|                        | Day 4 of maceration                                 | Day 7 of maceration | Day 9 of maceration |
| Aqueous                | $15.84 \pm 1.12$                                    | $22.85 \pm 2.47$    | $24.11 \pm 2.22$    |
| Ethanollic             | $13.71 \pm 2.14$                                    | $19.12 \pm 1.19$    | $22.15 \pm 2.51$    |

The values reported are average  $\pm$  standard deviation of  $n=3$ . The weight/mL of all the extracts was in the range of 1.3 to 1.4 g/mL
